# Supplementary material
Source: PubMed Central journal article supplement (PMC1949014)
Supplement: 7601789s1.pdf [file 7601789s1.pdf]

## Supplementary data #S1

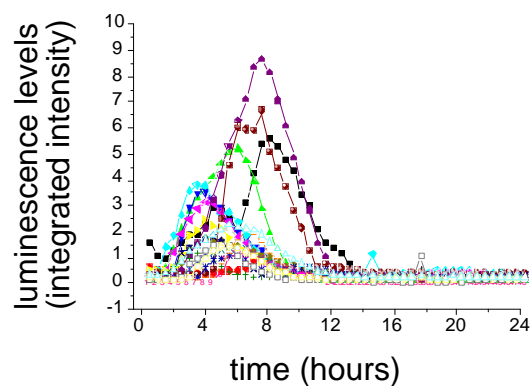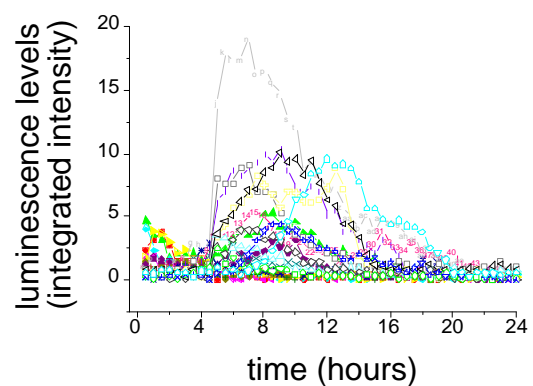

### ***S1. Single cell analysis of CD1 and E2F transcription in P19 cells.***

P19 cells were transfected with either E2F-luc or CD1-luc reporter plasmids. 24h after transfection, neuronal differentiation was induced using 1 $\mu$ M retinoic acid (RA). Simultaneously, firefly luciferin was added to the medium and luminescence imaging was carried out using a Hamamatsu VIM CCD camera. Images were acquired using 30 min integration times. Results are expressed as the integrated intensity of light in the analysed area for each transfected cell. Note that P19 cells are synchronized after differentiation induction and display a CD1 peak response after 4-8h of RA treatment, while E2F-dependent transcription peaks between 6 to 10 h. The transcription was assessed up to 4 days (not shown), yet, after 18 hours, no E2F-dependent transcription was detectable.
