# Supplementary material
Source: PubMed Central journal article supplement (PMC1949014)
Supplement: 7601789s2.pdf [file 7601789s2.pdf]

## Supplementary data #S2

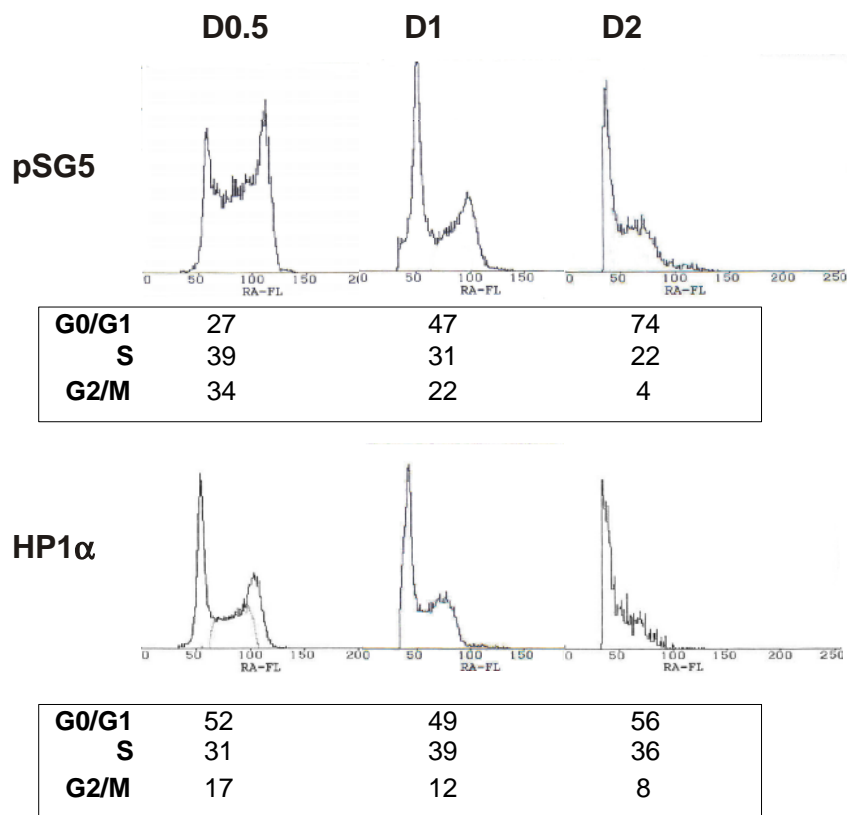

### **S2. Flow cytometry analysis of HP1 $\alpha$ overexpression in RA-induced P19 cells differentiation.**

These graphs correspond to quantitated histograms presented on figure 4C. P19 cells were co-transfected with EGFP and HP1 $\alpha$  overexpression vectors or empty pSG5 plasmid as a control and neuronal differentiation was induced 24 hours after transfection. Cell cycle stages were determined by flow cytometry analysis of propidium iodide stained cells at indicated times after RA treatment on GFP expressing cells.
