# Supplementary material
Source: PubMed Central journal article supplement (PMC1949014)
Supplement: 7601789s4.pdf [file 7601789s4.pdf]

# Supplementary data #S4

A

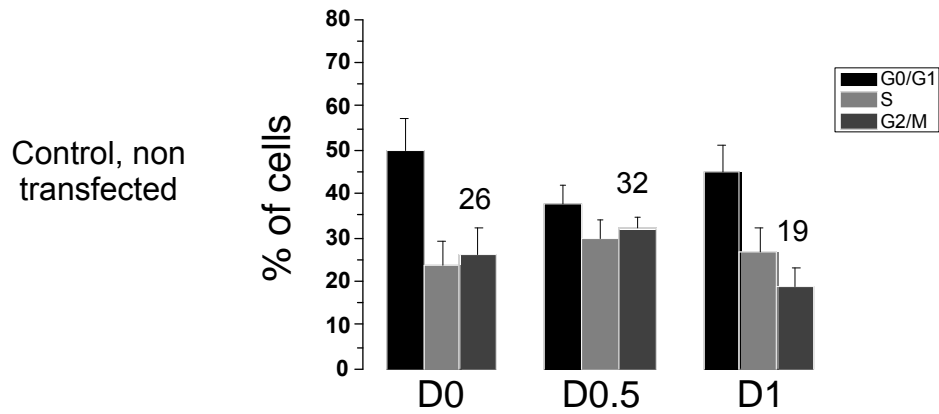

B

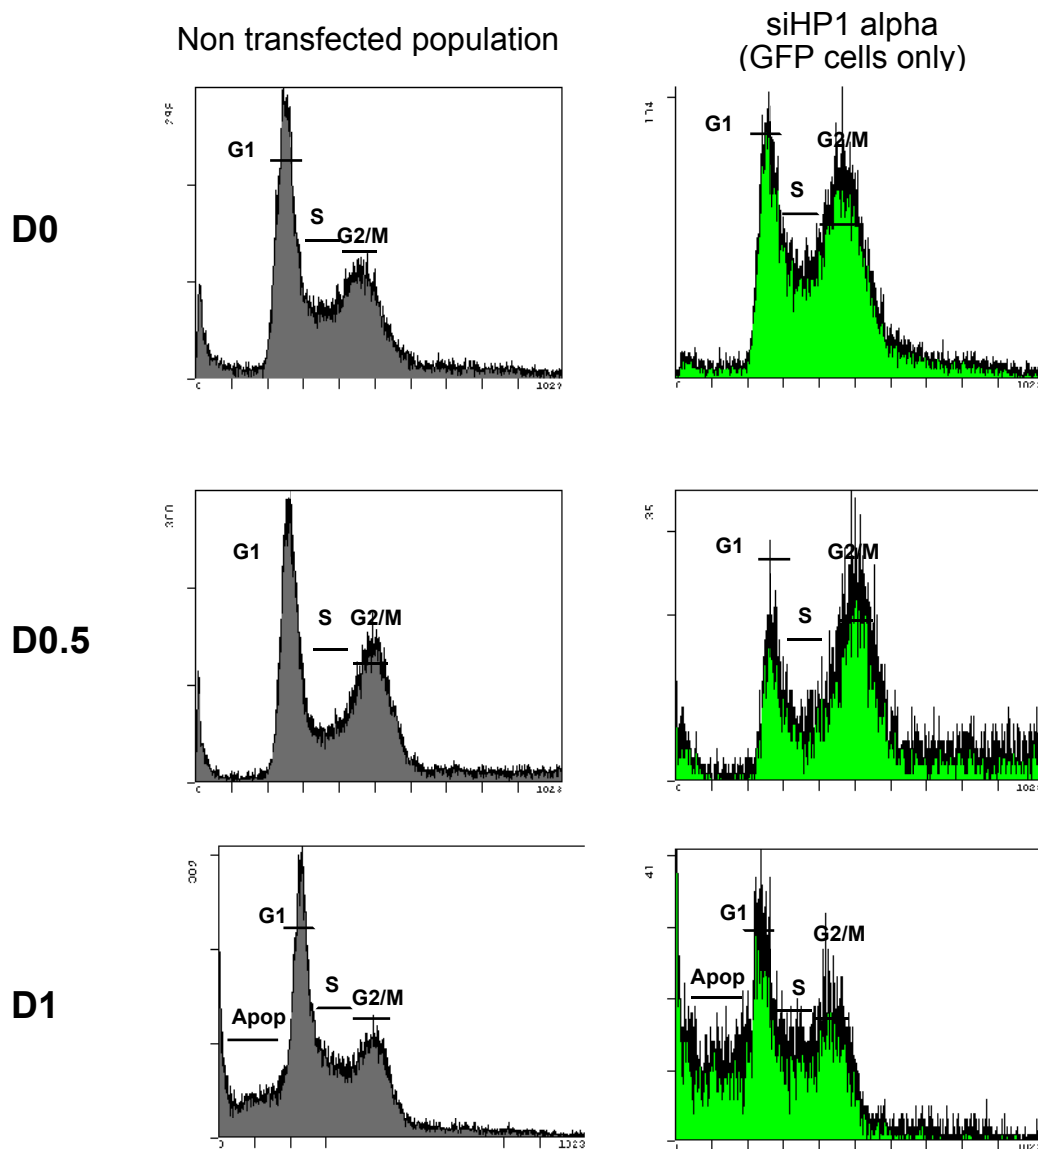

**S4. Flow cytometry analysis of HP1 $\alpha$  knock down in RA-induced P19 differentiation.** (A) Histograms representing the quantification of flow cytometry analysis of the population of non transfected cells corresponding to figure 5A. (B) These graphs correspond to quantitated histograms presented on figure 5A. Flow cytometry analysis of non transfected and the population of cells transfected with both GFP expression vector and siRNA against HP1 $\alpha$  at indicated times after RA treatment.
